# Supplementary material for: Towards the development of an alternative analysis method to determine lead in eyeliner cosmetics
Source: Royal Society of Chemistry journal article supplement (doi:10.1039/d5ay00389j), 2025-01-01
Supplement: d5ay00389j1.pdf [file d5ay00389j1.pdf]

# Supporting Information for Development of an Alternative Analysis Method to Determine Lead in Eyeliner Cosmetics

‡Catherine J. McMahon<sup>1</sup>, ‡Toni L. O. Barstis<sup>2</sup>, Rae A. Bellows<sup>1</sup>, and Charles S. Henry<sup>1,3\*</sup>

\* Corresponding Author E-mail: [chuck.henry@colostate.edu](mailto:chuck.henry@colostate.edu)

<sup>1</sup>. Colorado State University, Fort Collins, CO;

<sup>2</sup>. Saint Mary's College, Notre Dame, IN

<sup>3</sup>. Chulalongkorn University, Bangkok, Thailand

## Table of Contents

|                                                                                    |    |
|------------------------------------------------------------------------------------|----|
| Figure S1. Map of countries where samples were collected.....                      | S2 |
| Figure S2. Standard addition plots of analyzed cosmetics using ASV.....            | S2 |
| Figure S3. Voltammograms of analyzed cosmetic samples using standard addition..... | S3 |
| Figure S4. ICP-OES calibration curves and detailed methods.....                    | S4 |
| Table S1. Sample information and ICP-OES results for analyzed cosmetics.....       | S5 |
| Detailed Materials and Methods for ICP-MS.....                                     | S6 |

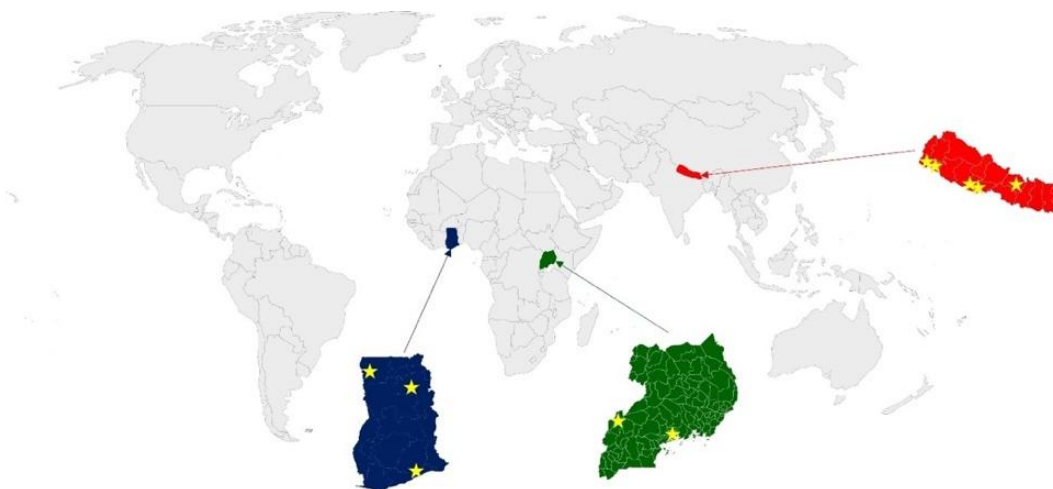

**Figure S1:** Map of the three countries where eyeliner cosmetic samples were collected. Stars represent the regions in each country where the sample was obtained.

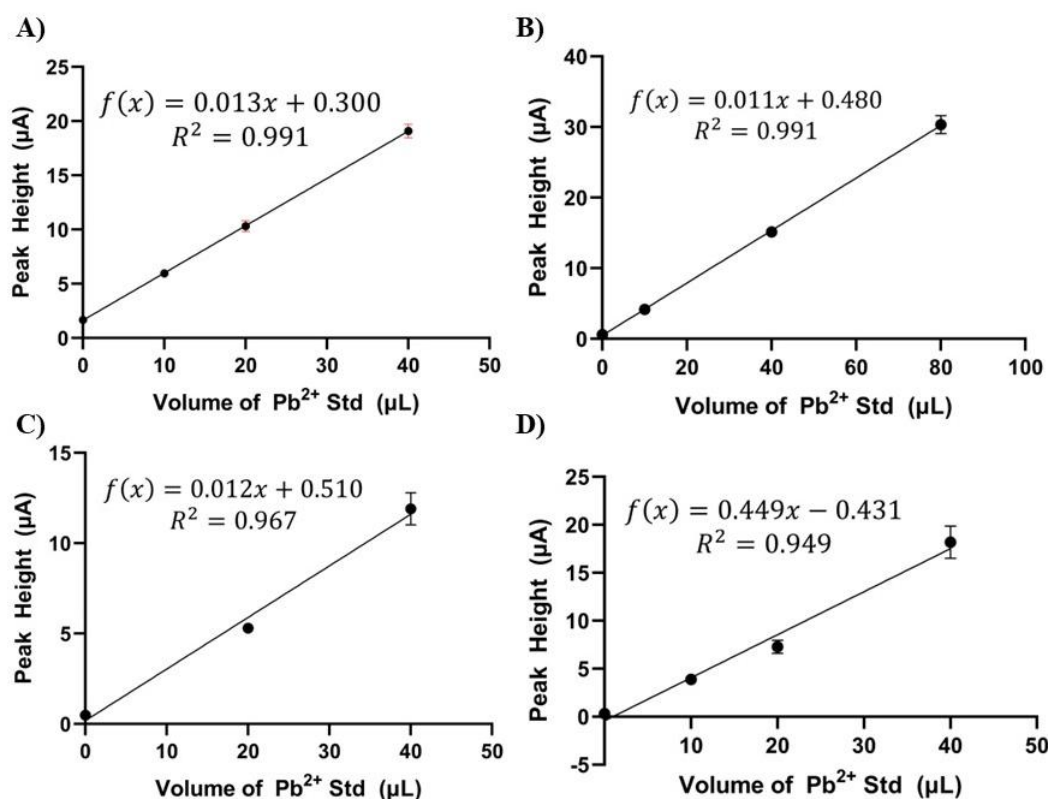

**Figure S2:** Standard addition plots of A) Sample 1, B) Sample 2, C) Sample 3, and D) Sample 4. Linear regression lines of best fit were used to calculate the x-intercept. The x-intercept was then used to calculate the concentration of the unknown using the concentration and volume of the standard used using **Equation 1**. All data have error bars, but points with small standard deviations are hard to see.

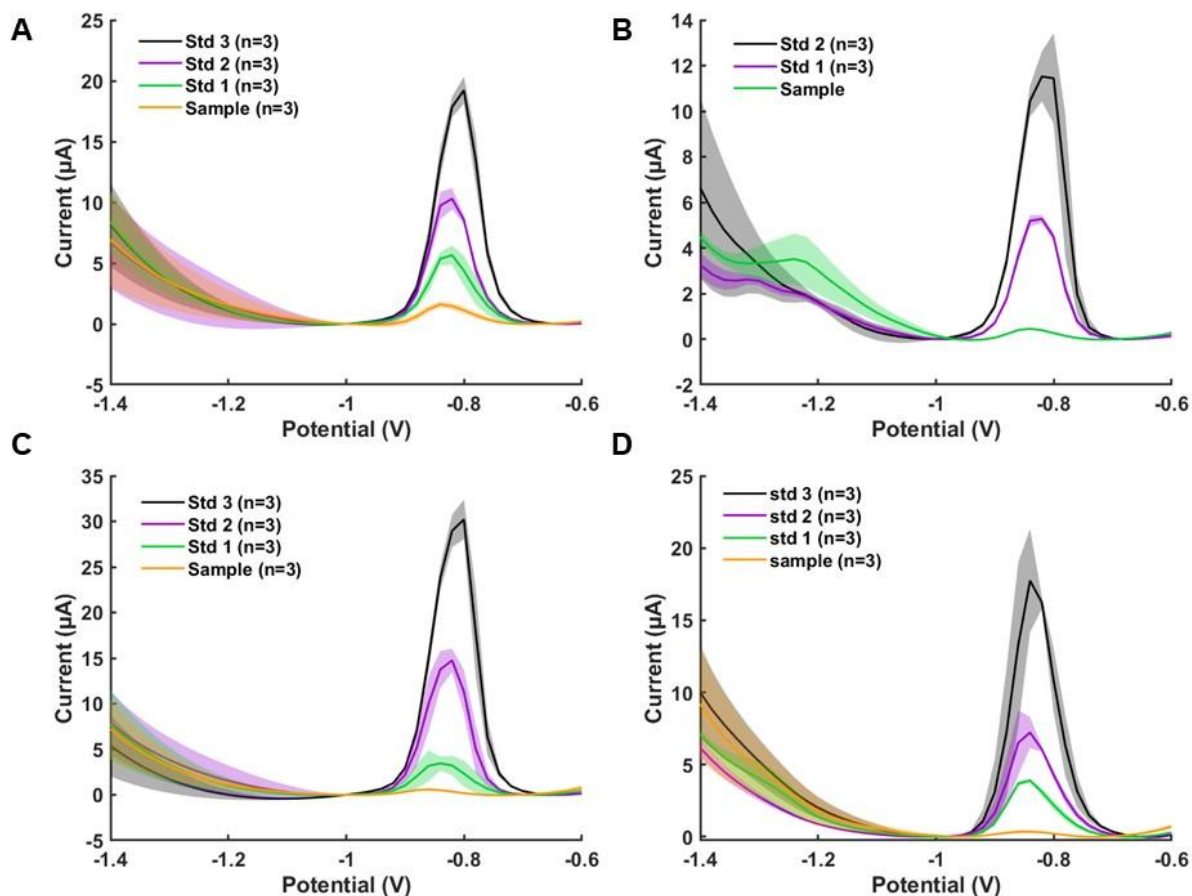

**Figure S3:** Voltammograms of  $\text{Pb}^{2+}$  deposition of the lead standards and sample with 2 ppm of  $\text{Bi}^{3+}$  for **A)** Sample 1, **B)** Sample 2, **C)** Sample 3, **D)** Sample 4. Analysis was performed in 0.1 M acetate buffer pH 4, 360 s deposition time, -1.4 V deposition potential. Shaded area represents the standard deviation for the voltammograms for  $n=3$ .

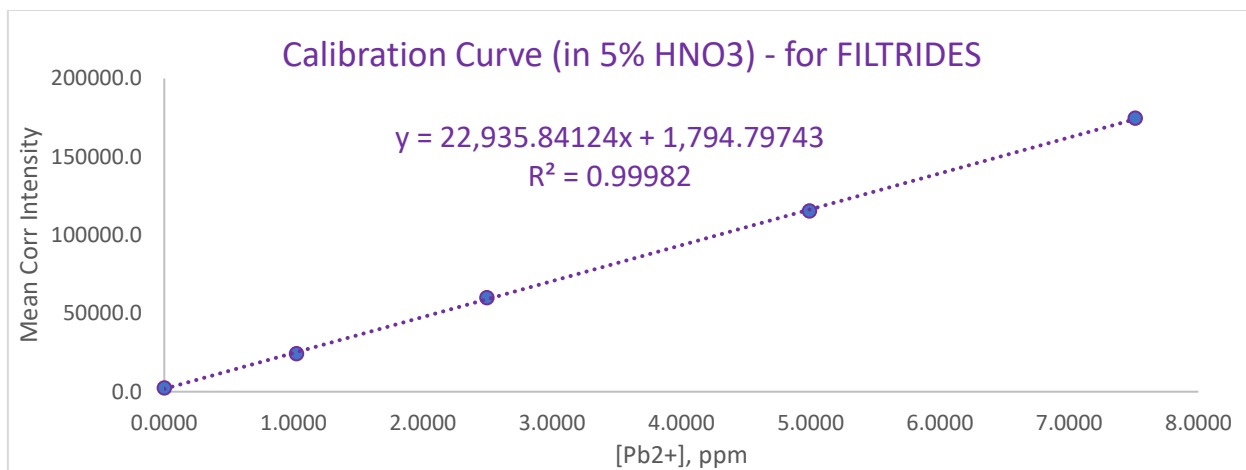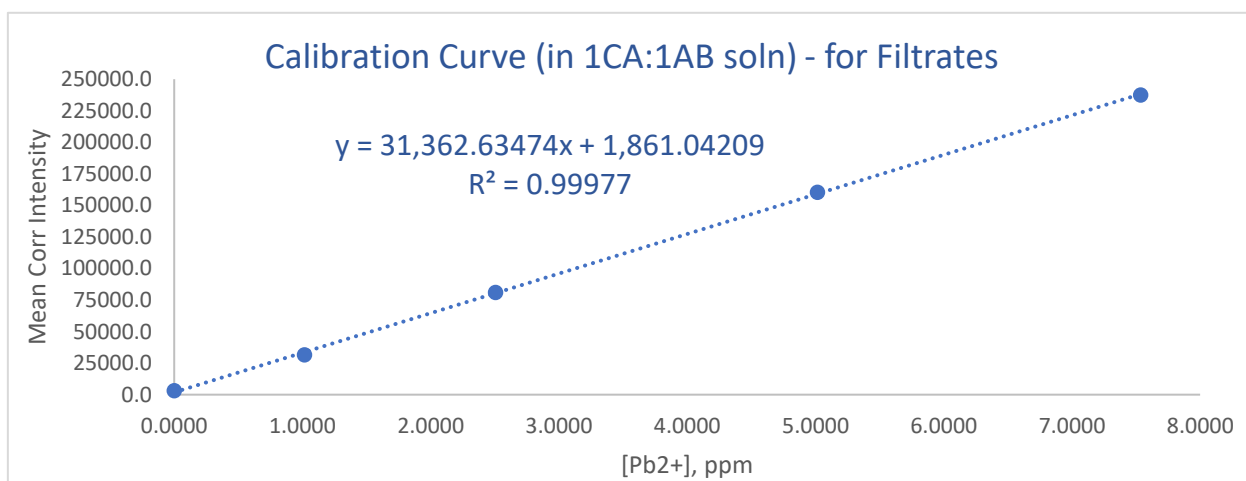

**Figure S4.** Representative calibration curves for the ICP-OES analysis of Pb<sup>2+</sup> in the cosmetic samples filtrides (top) and filtrates (bottom). Pb<sup>2+</sup> concentrations ranged from 0 – 7.5 ppm.

**Table S1:** Information about the 24 eyeliner cosmetics collected in Nepal, Ghana, and Uganda, including the XRF results, and ICP-OES results. Brands are reported as seen on the label of the cosmetic, and the matrix was determined from the label and physical examination.

| Country | Brand                                                                                | Matrix       | Elemental Composition (via XRF) | ICP-OES Measured [Pb <sup>2+</sup> ] <sub>avg</sub> , ppm |
|---------|--------------------------------------------------------------------------------------|--------------|---------------------------------|-----------------------------------------------------------|
| NEPAL   | S.O.N.A.T.A. Eye Liner Selfish (KTM-4, Sample 2 <sup>c</sup> )                       | Liquid       | -                               | 8±2 (n=3)                                                 |
|         | S.O.N.A.T.A. Premium Eye Liner                                                       | Liquid       | -                               | 2±2 (n=3)                                                 |
|         | Surma Mamira <sup>b</sup> (S-3, Sample 6 <sup>c</sup> and Sample 1 <sup>d</sup> )    | Solid/powder | Ca, Pb, Fe, Zn, Ti, As/Pb       | 1058±10 (n=1)                                             |
|         | Perfect Eyeliner                                                                     | Waxy paste   | -                               | 26±2 (n=1)                                                |
|         | Sheetal (SW-2, Sample 4 <sup>c</sup> )                                               | Waxy paste   | -                               | 18±2 (n=3)                                                |
|         | Homemade child eyeliner (SW-3, Sample 3 <sup>c</sup> )                               | Dried solid  | Ca, Pb, Fe, Zn, Ti, As/Pb       | 7±2 (n=1)                                                 |
|         | Ashok                                                                                | Solid/powder | Ca, Fe, Ni, Zn                  | 15±1 (n=3)                                                |
|         | Eye Improvement Powder                                                               | Solid/powder | S, Ca, Fe, Co, Cu, Zn           | 153±4 (n=1)                                               |
|         | Surma Mamira <sup>a,b</sup> (SW-6, Sample 1 <sup>c</sup> and Sample 2 <sup>d</sup> ) | Solid/powder | Ca, Fe, Mn, Zn, Ti, As/Pb, K    | 1939±30 (n=3)                                             |
| GHANA   | Al-Asmad                                                                             | Solid/powder | Ca, Zn, Cl, Fe, K, Mn           | 16±2 (n=3)                                                |
|         | Kohl Al-Sherifain (N-2, Sample 3 <sup>d</sup> )                                      | Solid/powder | Si, S, Zn, Fe, Ca               | 136±3 (n=3)                                               |
|         | Lateef Surma                                                                         | Solid/powder | Zn                              | 3±2 (n=3)                                                 |
|         | Mumtaz Delux Kajal Cold (Special Quality)                                            | Waxy paste   | -                               | 2±2 (n=3)                                                 |
|         | Mumtax Delux Kajal                                                                   | Waxy paste   | -                               | 19±2 (n=3)                                                |
|         | Khojati Surma No. 13 Black                                                           | Solid/powder | Zn, Fe                          | 84±2 (n=3)                                                |
|         | Hind Noor Eye Liner                                                                  | Solid/powder | Ca, Ti, Zn, Fe, K               | 70±3 (n=3)                                                |
|         | Hashmi Kohl Aswad <sup>b</sup> (N-2 child(2), Sample 4 <sup>d</sup> )                | Solid/powder | Pb, Zn                          | >100,000 (n=3)                                            |
|         | Hashmi (Natural) Kajal <sup>b</sup>                                                  | Waxy paste   | -                               | >500,000 (n=3)                                            |
|         | Hashmi Kohl Aswad <sup>b</sup>                                                       | Solid/powder | Pb, Zn                          | 449±58 (n=3)                                              |
|         | Mumtaz Delux Kajal <sup>b</sup>                                                      | Waxy paste   | -                               | >100,000 (n=3)                                            |
|         | Mumtaz Delux Kajal Cold (Special Quality)                                            | Waxy paste   | -                               | 441±30 (n=3)                                              |
|         | Natural rock <sup>a,b</sup> (N-2 stone)                                              | Solid/rock   | S, Pb                           | 63±2 (n=5)                                                |
| UGANDA  | Starlet Kojal                                                                        | Waxy paste   | -                               | 35±2 (n=3)                                                |
|         | Starlet Kojal                                                                        | Waxy paste   | -                               | 40±2 (n=3)                                                |

<sup>a</sup>SW-6 (commercial eyeliner sample) and N-2 stone (natural eyeliner sample) were analyzed via XRF.

<sup>b</sup>Due to the very high concentrations of Pb in these commercial and natural eyeliner cosmetics, these seven samples were not tested via the alternate extraction and electrochemical analysis method.

<sup>c</sup>Six samples from Nepal analyzed via ICP-MS. Due to low sample size, KTM-4, Sample 5 (gel eyeliner) was only analyzed via ICP-MS.

<sup>d</sup>Four samples analyzed via ASV.

## DETAILED MATERIALS AND METHODS FOR ICP-MS:

**Sample Preparation:** Approximately 50mg of sample was weighed into pre-cleaned 15mL Savillex® Teflon beakers. 4.0mL of double-distilled (DD) concentrated (16N) HNO<sub>3</sub> (Sigma Aldrich) was added to each sample and placed on a hotplate to reflux at 200°C for 48h. Samples were subsequently removed from the hotplate and cooled for 1h. Any sample residue adhered to the sides of the beakers was rinsed with 18 MΩ cm<sup>-2</sup> water. The samples were then placed on the hotplate at 110°C to dryness. 2.0ml of DD 16N HNO<sub>3</sub> was added to the dried samples, and beakers were recapped and placed on the hotplate at 200°C for 48h. Samples were again removed from the hotplate and cooled. Two or three drops of 30% H<sub>2</sub>O<sub>2</sub> were added to each sample. Once the reaction subsided, the samples were placed on the hotplate again for 60min. This process of removing the sample to cool and adding H<sub>2</sub>O<sub>2</sub> and DD concentrated HNO<sub>3</sub> was repeated until there was no further reaction. Samples were placed on the hotplate at 110°C to evaporate to dryness. Subsequent to this last evaporation cycle, 3mL of DD 16N HNO<sub>3</sub> was added and then diluted to a final volume of ~100mL with 18 MΩ cm<sup>-2</sup> water. Aliquots from the digested solutions were used for both trace elements and isotopic measurements.

**ICP-MS Analysis:** Trace element concentrations of all solution aliquots were collected on a Nu Instruments AttoM High Resolution (HR) inductively coupled plasma mass spectrometer (ICP-MS). All trace element analyses were conducted in wet plasma mode in medium mass resolution ( $M/\Delta M \approx 2500$ ), and at the start of each analytical session the instrument was tuned and calibrated using a multi element solution (Li, B, Na, Si, Sc, Co, Ga, Y, Rh, In, Ba, Lu, Tl, and U; 1 ng/g). In and Rh were used as an internal standard to monitor and correct for instrument drift and matrix effects. Trace element abundances were calculated based on an external calibration technique.
